# Supplementary material
Source: HighWire-hosted journal article supplement (https://bmjopen.bmj.com/content/11/9/e047279)
Supplement: inline-supplementary-material-5 [file inline-supplementary-material-5.pdf]

**Table S5.** Methods used to quantify the performance of the models reported in the 6 articles with development and validation studies and the 25 articles with an external validation

|                                                                                                           | Development & Validation<br>studies<br>N=6 | Stand-alone<br>external validation studies<br>N=25 |
|-----------------------------------------------------------------------------------------------------------|--------------------------------------------|----------------------------------------------------|
| Discrimination ( <i>ability to differentiate between patients who do or do not experience the event</i> ) |                                            |                                                    |
| AUC ROC curve with 95%CI                                                                                  | 4                                          | 16                                                 |
| AUC ROC curve without 95%CI                                                                               | 2                                          | 6                                                  |
| Sensitivity & specificity                                                                                 | 1                                          | 8                                                  |
| Calibration ( <i>agreement between predictions from the model and observed outcomes</i> )                 |                                            |                                                    |
| Hosmer–Lemeshow test                                                                                      | 3                                          | 9                                                  |
| GiViTI calibration belt                                                                                   |                                            | 2                                                  |
| Contingency table                                                                                         |                                            | 1                                                  |
| Calibration histogram                                                                                     | 1                                          | 4                                                  |
| Calibration curve & statistical tests                                                                     |                                            | 4                                                  |
| Global performance ( <i>simultaneous evaluation of calibration and discrimination</i> )                   |                                            |                                                    |
| Accuracy                                                                                                  | 1                                          | 1                                                  |
| Brier score                                                                                               |                                            | 1                                                  |
| R <sup>2</sup>                                                                                            | 1                                          | 3                                                  |

AUC ROC: Area Under the Receiving Operative Curve; 95%CI: 95% Confident Interval
